# Supplementary material for: Clinical Utility of Oncuria™, a Multiplexed Liquid Biopsy for the Non-Invasive Detection of Bladder Cancer—A Pilot Study
Source: MDPI journal article supplement (doi:10.3390/diagnostics12010131), 2022-01-06
Supplement: s1 [file s1]

# Demographics and Practice Characteristics of Fifteen Urologists Responding to Urine-Based Bladder Cancer Detection Assay Screening Attitude and Behavior Survey

| Variable               | Characteristics        | Frequency (%) | National Trends (%) [12] |
|------------------------|------------------------|---------------|--------------------------|
| Age (years)            | 30-45                  | 46            | 28                       |
|                        | 46-60                  | 26            | 42.4                     |
|                        | ≥65                    | 28            | 29.6                     |
| Gender                 | Male                   | 86            | 90.1                     |
|                        | Female                 | 14            | 9.9                      |
| Race                   | White                  | 73            | 84.7                     |
|                        | Non-white              | 27            | 15.3                     |
| Practice specialty     | General Urology        | 80            | 65                       |
|                        | Urologic Oncology      | 20            | 12.4                     |
| Practice type          | Group/Academic         | 40            | 27.3                     |
|                        | Group/Private          | 33            | 43.9                     |
|                        | Hospital based         | 20            | 28.8                     |
|                        | Solo practice          | 7             | 9.4                      |
| Office setting         | Urban/Metropolitan     | 86            | 89.6                     |
|                        | Rural/Non-Metropolitan | 14            | 10.4                     |
| % Medicare in practice | <25%                   | 13            | ---                      |
|                        | 26-50                  | 46            | ---                      |
|                        | >50%                   | 71            | ---                      |
| % Medicaid in practice | <25%                   | 86            | ---                      |
|                        | 26-50                  | 14            | ---                      |
|                        | >50%                   | 0             | ---                      |
